# Supplementary material for: Activating FeMoO4 nanosheet arrays by partial nickel substitution for efficient electrocatalytic seawater oxidation
Source: Royal Society of Chemistry journal article supplement (doi:10.1039/d4cc05027d), 2024-01-01
Supplement: d4cc05027d4.pdf [file d4cc05027d4.pdf]

Electronic Supplementary Information (ESI) for Chemical Communications  
This journal is (c) The Royal Society of Chemistry 2024

## Supporting Information

### **Activating FeMoO<sub>4</sub> nanosheet arrays by partial nickel substitution for efficient electrocatalytic seawater oxidation**

Jun-Ya Gao,<sup>a,#</sup> Yin-Lei Ma,<sup>a,#</sup> Guang-Sheng Qian,<sup>a</sup> Meng-Ying Si,<sup>a</sup> Ling-Li Han,<sup>a</sup> and  
Ji-Sen Li<sup>a, b,\*</sup>

<sup>a</sup>School of Chemistry, Chemical Engineering and Materials, Jining University, Qufu  
273155, P. R. China

<sup>b</sup>Key Laboratory of Advanced Energy Materials Chemistry (Ministry of Education),  
Nankai University, Tianjin 300071, P. R. China

<sup>#</sup>These authors contributed equally to this work.

\*Corresponding authors. E-mail: senjili@sina.com (J.-S. Li)

## EXPERIMENTAL SECTION

**Synthesis of FNMO/NF.** In typical procedure, a piece of NF (1 cm × 3 cm) was pre-treated sequentially with hydrochloric acid, acetone, and deionized water, respectively. Then, 50 mL deionized water consisting of 811 mg  $\text{FeCl}_3 \cdot 6\text{H}_2\text{O}$ , 242 mg L-cysteine, and 618 mg  $\text{Na}_2\text{MoO}_4 \cdot 2\text{H}_2\text{O}$  was prepared by ultrasonication and transferred into a Teflon reactor. Next, the treated NF was soaked into the mixture and heated at 170 °C for 12 h. The  $\text{Fe}_x\text{Ni}_{1-x}\text{MoO}_4$  (named FNMO/NF) was obtained by washing with ethanol and water for several times, and then dried at 60 °C in a vacuum oven.

**Synthesis of FMO/NF and NMO/NF.** The fabrication of FMO/NF and NMO/NF are similar to that of FNMO/NF apart from using  $\text{FeCl}_2 \cdot 4\text{H}_2\text{O}$  and  $\text{NiCl}_2 \cdot 6\text{H}_2\text{O}$  instead of  $\text{FeCl}_3 \cdot 6\text{H}_2\text{O}$ , respectively.

**Synthesis of Pt/C/NF and  $\text{IrO}_2$ /NF.** 20 mg of commercial Pt/C was added into a mixture (1930  $\mu\text{L}$  ethanol and 70  $\mu\text{L}$  Nafion) and thus form a uniform ink by ultrasonication. Then, a certain amount of the ink was coated on a piece of NF (1 cm × 1 cm) with a loading mass of 1.4  $\text{mg cm}^{-2}$ .  $\text{IrO}_2$ /NF was also prepared via the same way.

**Instruments.** Power X-ray diffraction (PXRD) patterns were achieved by D/max/2500PC. Scanning electron microscope (SEM, Regulus 8100), high-resolution transmission electron microscopy (HRTEM, JEM-F200), thermogravimetric analysis (TG, PE DSC8500) and X-ray photoelectron spectroscopy (XPS, PHI 5000 Versa) were performed to examine the morphology and component of the resultant materials.

**Electrochemical Measurements.** The Electrochemical measurements were performed on an electrochemical workstation (CHI 760E) with a three-electrode setup, wherein the self-supported catalyst was served as the working electrode, a graphite rod as the counter electrode, and the reversible hydrogen electrode as reference electrode, respectively. The linear sweep voltammetry (LSV) tests were carried out at a scan rate of 2  $\text{mV s}^{-1}$  in 1 M KOH, 1 M KOH + 0.5 M NaCl, and 1.0 M KOH + seawater electrolytes toward the OER, respectively. The double-layer capacitance ( $C_{\text{dl}}$ ) was assessed according to cycle voltammetry (CV) curves with different scan rates from 20 to 100  $\text{mV s}^{-1}$ .

## S1. Figures in Supporting Information

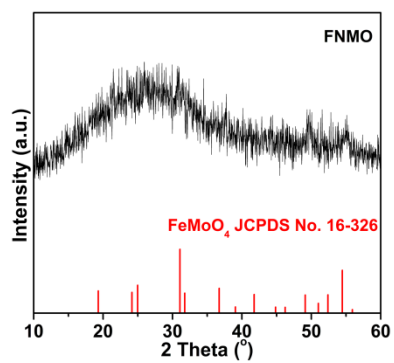

**Fig. S1** PXRD pattern of FNMO scraped from NF.

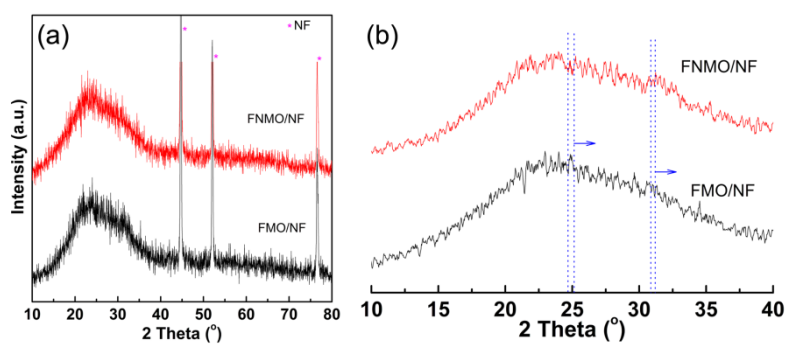

**Fig. S2** (a) PXRD patterns and (b) the magnified patterns of FNMO/NF and FMO/NF.

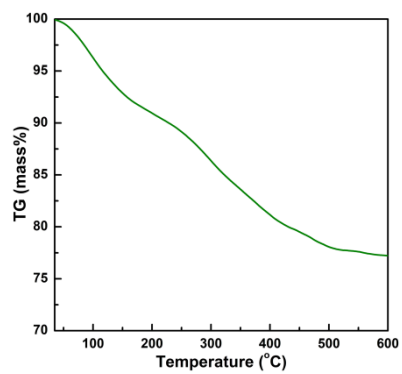

**Fig. S3** TG profile of FNMO.

When FNMO is heated in the temperature range of 35-600 °C (Fig. S3, ESI†), the mass loss is ascribed to the removal of water (35-180 °C) and phase transformation of MoO<sub>x</sub> and FeO<sub>x</sub> oxides (180-600 °C).

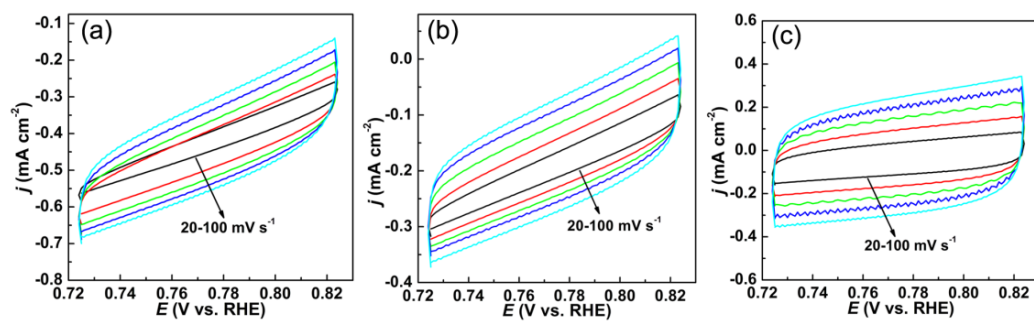

**Fig. S4** (a-c) Cyclic voltammograms of NMO/NF, FMO/NF, and FNMO/NF, respectively.

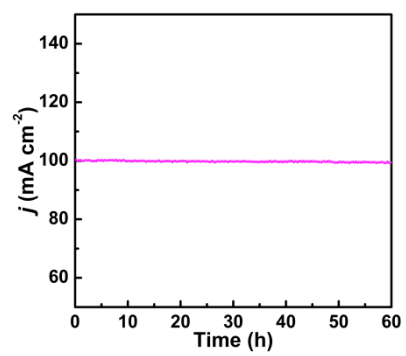

**Fig. S5** Stability test of FNMO/NF in 1 M KOH.

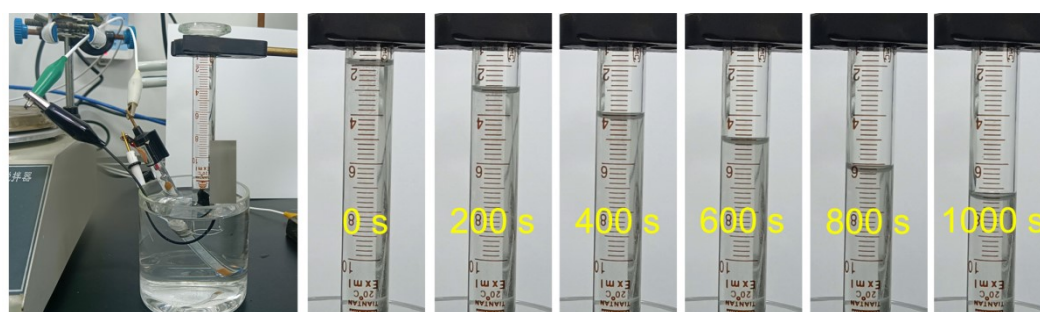

**Fig. S6** Gas collection device toward the OER and digital photographs of  $O_2$  produced at different time.

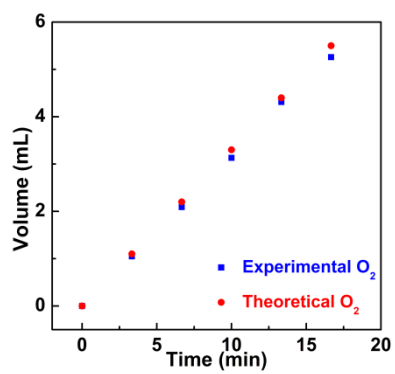

**Fig. S7** Faraday efficiency of FNMO/NF toward the OER.

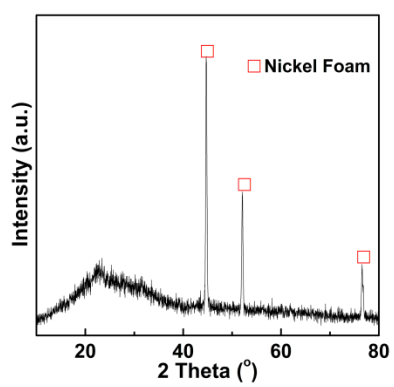

**Fig. S8** PXRd of FNMO/NF after stability testing.

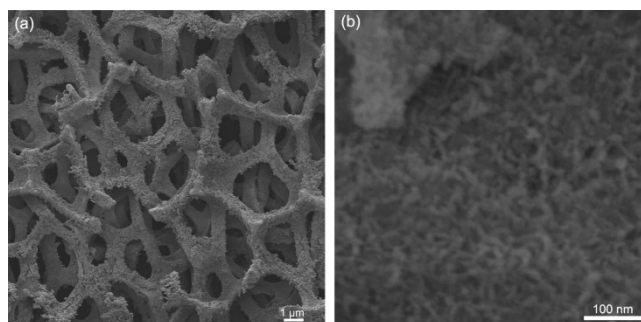

**Fig. S9** SEM image of FNMO/NF after stability testing.

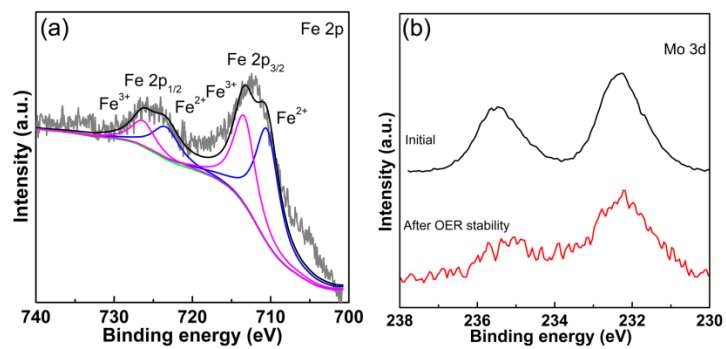

**Fig. S10** High-resolution XPS spectrum of Fe 2p (a) and Mo 3d (b) for FNMO after stability testing.

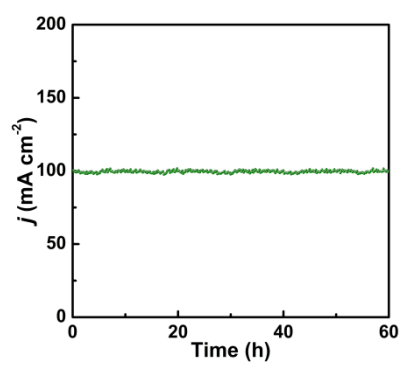

**Fig. S11** Stability tests of FNMO/NF in 1 M KOH + seawater.

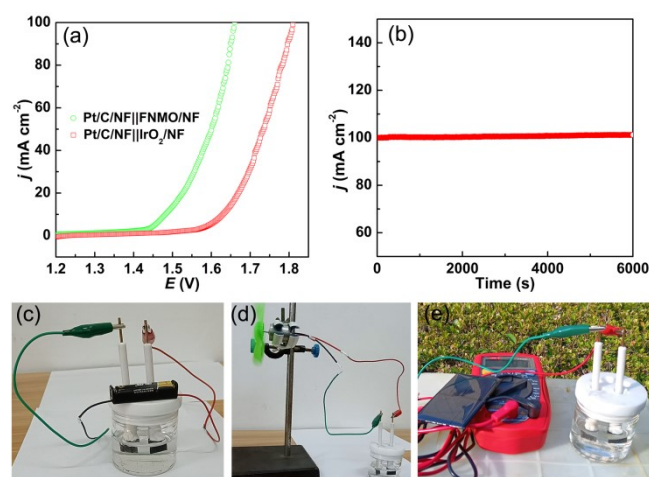

**Fig. S12** (a) LSV curves of Pt/C/NF||FNMO/NF and Pt/C/NF||IrO<sub>2</sub>/NF for overall seawater splitting and (b) long-term durability test at a voltage of 1.66 V in 1 M KOH + seawater. (c-e) 1.5 V battery, wind, and solar energy drive the overall seawater splitting.

## S2. Tables in Supporting Information

**Table S1.** Comparison of catalytic OER performance of FNMO/NF and other reported catalysts in 1 M KOH solution.

| Catalyst                                              | Overpotential (mV)<br>at 10 mA cm <sup>-2</sup> | Overpotential (mV)<br>at 100 mA cm <sup>-2</sup> | Tafel<br>(mV dec <sup>-1</sup> ) | Reference                                         |
|-------------------------------------------------------|-------------------------------------------------|--------------------------------------------------|----------------------------------|---------------------------------------------------|
| FNMO/NF                                               | 215                                             | 251                                              | 32.8                             | <b>This work</b>                                  |
| NiFe-Ppy                                              | 229                                             | 268                                              | 38                               | Angew. Chem. Int. Ed. 2024, e202409628            |
| Fe/P-NiMoO <sub>4</sub>                               | 213                                             | 327                                              | /                                | Appl. Catal. B Environ. Energy 2024, 347, 123805. |
| FeMoO <sub>4</sub> /NF                                | /                                               | 263                                              | 39                               | Nano Res. 2024, 17, 2270-2275.                    |
| 60Fe/NF                                               | /                                               | 340                                              | 57                               | Adv. Energy Mater. 2023, 13, 2301921.             |
| Ru-Ni(Fe)P <sub>2</sub> /NF                           | /                                               | 251                                              | 91.6                             | Small 2023, 19, e2300030.                         |
| P-Mo-Co <sub>3</sub> O <sub>4</sub> @CC               | 276                                             | 315                                              | 53.9                             | Carbon Energy. 2022; 1, 14.                       |
| MoNiFe-27%                                            | 242                                             | 280                                              | 23                               | Nat. Commun. 2022, 13, 2191.                      |
| NiFe LD-PMo12                                         | 206                                             | 249                                              | 47.5                             | Adv. Mater. 2022, 34, 2110696.                    |
| CF-FeSO                                               | 192                                             | 230                                              | 40.1                             | Nat. Commun. 2022, 13, 605.                       |
| CoNiFeCu                                              | 291                                             | 345                                              | 43.9                             | Adv. Mater. 2022, 2109108.                        |
| CoOOH/CoS                                             | 240                                             | 360                                              | 86.4                             | Angew. Chem. Int. Ed. 2022, 61, e202117178.       |
| Ni-Mo-B HF                                            | 293                                             | 290                                              | 79                               | Adv. Funct. Mater. 2021, 2107308.                 |
| FeP-CoP/NC                                            | 230                                             | 390                                              | 73                               | Nat. Commun. 2021, 12, 4143.                      |
| NiCoFe-NDA/NF                                         | 215                                             | 270                                              | 50.7                             | Energy Environ. Sci. 2021, 14, 6546.              |
| NiFe LDH/NiS <sub>2</sub>                             | 220                                             | 386                                              | 60.1                             | Adv. Energy Mater. 2021, 2102353.                 |
| CoCu-MOF NBs                                          | 260                                             | 320                                              | 63.5                             | Angew. Chem. Int. Edit. 2021, 60, 26397.          |
| MOF-Fe/Co                                             | 220                                             | 300                                              | 52                               | Angew. Chem. Int. Edit. 2021, 60, 12097.          |
| NiCo <sub>2x</sub> Fe <sub>x</sub> O <sub>4</sub> NBs | 274                                             | 308                                              | 42                               | Angew. Chem. Int. Edit. 2021, 60, 11841.          |
| NiCe@NiFe                                             | 220                                             | 254                                              | 59.9                             | Appl. Catal. B Environ. 2020, 260, 118199.        |

**Table S2.** Comparison of catalytic OER performance of FNMO/NF and other reported catalysts in 1 M KOH + seawater.

| Catalyst                                                              | Overpotential (mV)<br>at 100 mA cm <sup>-2</sup> | Reference                                    |
|-----------------------------------------------------------------------|--------------------------------------------------|----------------------------------------------|
| FNMO/NF                                                               | 269                                              | <b>This work</b>                             |
| FeMoO <sub>4</sub> /NF                                                | 303                                              | Nano Res. 2024, 17, 2270.                    |
| Fe-doped Ni&Ni <sub>0.2</sub> Mo <sub>0.8</sub> N                     | 234                                              | Energy Environ. Sci. 2022, 15, 3945.         |
| NiCoHPi@Ni <sub>3</sub> N/NF                                          | 396                                              | ACS Appl. Mater. Interfaces 2022, 14, 22061. |
| Ni(OH) <sub>2</sub> -TCNQ/GP                                          | 382                                              | Nano Res. 2022, 15, 6084.                    |
| Mo-Co <sub>x</sub> P                                                  | 520                                              | Mater. Today Nano 2022, 18, 100216.          |
| NiMoO <sub>4</sub> @NiFe-LDH                                          | 251                                              | Sustain. Energ. Fuels. 2022, 6, 5521.        |
| BZ-NiFe-LDH/CC                                                        | 300                                              | Nano Res. Energy 2022, 1, e9120028.          |
| S-NiMoO <sub>4</sub>                                                  | 315                                              | J. Colloid Interf. Sci. 2022, 613, 349.      |
| Fe-Co <sub>3</sub> (PO <sub>4</sub> ) <sub>2</sub> ·4H <sub>2</sub> O | 287                                              | Chem. Commun. 2022, 58, 6761.                |
| CoPx@FeOOH                                                            | 290                                              | Appl. Catal. B Environ. 2021, 294, 120256.   |
| NiMoN@NiFeN/NF                                                        | 307                                              | Nat. Commun. 2019, 10, 10.                   |
| NiCoS/NF                                                              | 360                                              | Appl. Catal. B Environ. 2021, 291, 120071.   |
